# Supplementary material
Source: HighWire-hosted journal article supplement (https://jnm.snmjournals.org/highwire/filestream/93853/field_highwire_adjunct_files/0/jnm085142_Supplemental_data.pdf)
Supplement: jnm085142_Supplemental_data.pdf [file jnm085142_Supplemental_data.pdf]

**SUPPLEMENTAL TABLE 1.** Lesion-by-lesion comparison of 3 imaging modalities: GLP-1 receptor scan, sst<sub>2</sub> receptor scan and CT.

| Tumor site            | GLP-1 Receptor<br>Positive tumors | sst <sub>2</sub> Receptor Positive<br>tumors | All tumors                                   |               |
|-----------------------|-----------------------------------|----------------------------------------------|----------------------------------------------|---------------|
|                       | GLP-1<br>Receptor scan            | sst <sub>2</sub><br>Receptor scan            | GLP-1 and sst <sub>2</sub><br>Receptor scans | CT<br>Abdomen |
| Primary tumor*        | 3/3                               | 3/3                                          | 6/6                                          | 4/6           |
| Lymph node metastases | 5/5                               | 7/7                                          | 12/12                                        | 12/12         |
| Liver metastases      | 6/6                               | 25/25                                        | 31/31                                        | 25/31         |
| Bone metastases       | 1/1                               | 0/0                                          | 1/1                                          | 0/1           |
| Lung metastases       | 1/1                               | 0/0                                          | 1/1                                          | 1/1           |
| Total                 | 16/16                             | 35/35                                        | 51/51                                        | 42/51         |

\* All patients had their primary tumor located in the pancreas
